# Supplementary material for: Proteomic analysis of somatic embryo development in Musa spp. cv. Grand Naine (AAA)
Source: PubMed Central journal article supplement (PMC7066174; doi:10.1038/s41598-020-61005-2), 2020-03-11

## Title Page

### Title of the Manuscript

**Proteomic analysis of somatic embryo development in *Musa* spp. cv. Grand Naine (AAA)**

### Affiliations and address of the authors

- 1) Mr. Marimuthu Kumaravel, MSc  
Senior Research Fellow, Crop Improvement Division,  
ICAR-National Research Centre for Banana  
Thogamalai Main Road, Thayanoor Post, Tiruchirappalli 102,  
Tamil Nadu. India  
e-mail: [velu\\_bai@yahoo.co.in](mailto:velu_bai@yahoo.co.in)
- 2) Dr. Subbaraya Uma\*, Ph.D.  
Principal Scientist, Crop Improvement Division,  
ICAR-National Research Centre for Banana  
Thogamalai Main Road, Thayanoor Post, Tiruchirappalli 102,  
Tamil Nadu. India  
e-mail: [umabinit@yahoo.co.in](mailto:umabinit@yahoo.co.in)
- 3) Dr. Suthanthiram Backiyarani, Ph.D.  
Principal Scientist, Crop Improvement Division,  
ICAR-National Research Centre for Banana  
Thogamalai Main Road, Thayanoor Post, Tiruchirappalli 102,  
Tamil Nadu. India  
e-mail: [backiyarani@gmail.com](mailto:backiyarani@gmail.com)
- 4) Dr. Marimuthu Somasundaram Saraswathi, Ph.D.  
Principal Scientist, Crop Improvement Division,  
ICAR-National Research Centre for Banana  
Thogamalai Main Road, Thayanoor Post, Tiruchirappalli 102,  
Tamil Nadu. India  
e-mail: [saraswathimse@gmail.com](mailto:saraswathimse@gmail.com)

## **Corresponding Author**

\*Dr. Subbaraya Uma\*, Ph.D.

Principal Scientist, Crop Improvement Division,

ICAR-National Research Centre for Banana

Thogamalai Main Road, Thayanoor Post, Tiruchirappalli 102,

Tamil Nadu. India

e-mail: [umabinit@yahoo.co.in](mailto:umabinit@yahoo.co.in)

Telephone no: 0431-2618125, Mobile no: +919442553117

# Grand Naine somatic embryo development 2019

Experiment: Grand Naine somatic embryo development 2019

Report created: 6/1/2019 1:32:50 PM

Reference image

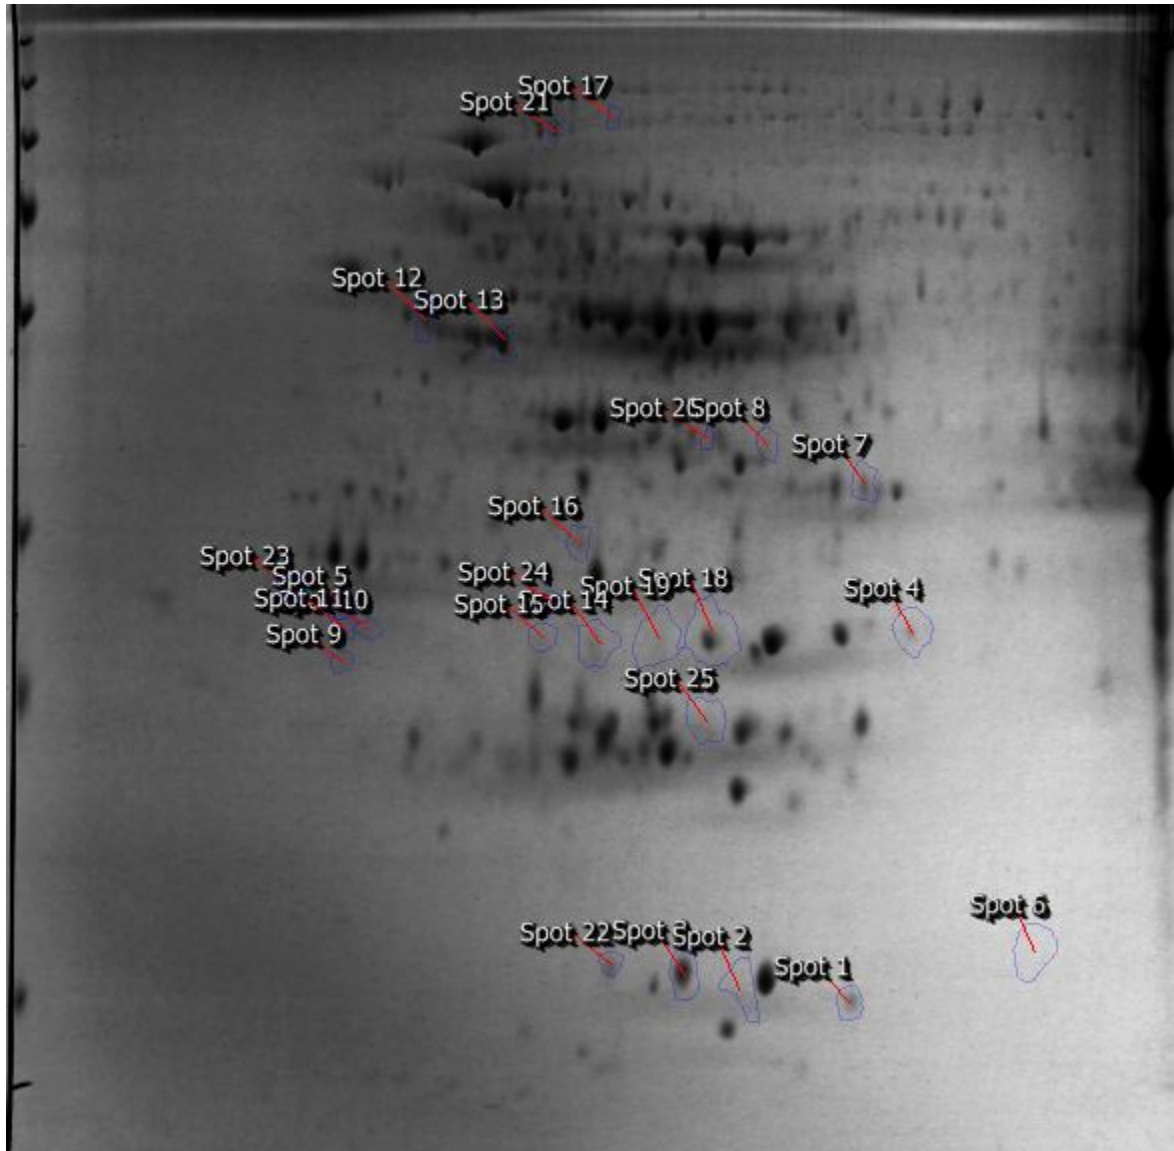

## Experiment Design

| Group | Grand Naine<br>ECS/0th Day | Grand Naine 30th<br>Day somatic | Grand Naine 45th<br>Day somatic | Grand Naine 60th<br>Day somatic |
|-------|----------------------------|---------------------------------|---------------------------------|---------------------------------|
|-------|----------------------------|---------------------------------|---------------------------------|---------------------------------|

|                   | somatic embryo | embryos | embryos | embryos |
|-------------------|----------------|---------|---------|---------|
| <b>Replicates</b> | 3              | 3       | 3       | 3       |

## Spots

| Anova (p)  | Fold | Notes      | Average Normalised Volumes                      |                                               |                                               |                                               |
|------------|------|------------|-------------------------------------------------|-----------------------------------------------|-----------------------------------------------|-----------------------------------------------|
|            |      |            | Grand Naine<br>ECS/0th Day<br>somatic<br>embryo | Grand Naine<br>30th Day<br>somatic<br>embryos | Grand Naine<br>45th Day<br>somatic<br>embryos | Grand Naine<br>60th Day<br>somatic<br>embryos |
| 7.176e-006 | 2.1  | Spot<br>17 | 1.127e+006                                      | 6.217e+005                                    | 6.160e+005                                    | 1.305e+006                                    |
| 4.507e-004 | 2.4  | Spot<br>21 | 1.301e+006                                      | 1.475e+006                                    | 6.243e+005                                    | 9.963e+005                                    |
| 3.172e-004 | 5.6  | Spot<br>20 | 3.701e+005                                      | 5.747e+005                                    | 1.065e+006                                    | 2.055e+006                                    |
| 0.002      | 5.5  | Spot<br>23 | 1.037e+006                                      | 2.141e+006                                    | 4.035e+006                                    | 7.288e+005                                    |
| 5.533e-006 | 5.8  | Spot<br>4  | 2.726e+006                                      | 5.067e+006                                    | 1.394e+007                                    | 1.578e+007                                    |
| 4.851e-009 | 16.5 | Spot<br>18 | 5.593e+006                                      | 1.553e+007                                    | 2.341e+007                                    | 9.238e+007                                    |
| 4.755e-004 | 6.1  | Spot<br>19 | 8.202e+006                                      | 7.598e+006                                    | 1.275e+007                                    | 4.640e+007                                    |
| 5.910e-005 | 10.1 | Spot<br>9  | 1.318e+006                                      | 1.169e+006                                    | 3.807e+005                                    | 3.834e+006                                    |
| 1.139e-006 | 1.8  | Spot<br>25 | 7.677e+006                                      | 1.187e+007                                    | 1.011e+007                                    | 1.413e+007                                    |
| 3.026e-006 | 8.1  | Spot<br>6  | 2.431e+006                                      | 3.623e+006                                    | 1.966e+007                                    | 1.283e+007                                    |
| 1.053e-008 | 7.7  | Spot<br>3  | 2.215e+006                                      | 1.562e+007                                    | 7.498e+006                                    | 1.703e+007                                    |
| 9.192e-005 | 6.1  | Spot<br>1  | 7.154e+005                                      | 4.332e+006                                    | 2.363e+006                                    | 1.563e+006                                    |
| 1.146e-006 | 8.2  | Spot<br>2  | 3.523e+006                                      | 6.718e+006                                    | 8.062e+006                                    | 2.894e+007                                    |
| 2.234e-004 | 3.6  | Spot<br>5  | 1.627e+006                                      | 1.157e+006                                    | 2.189e+006                                    | 4.156e+006                                    |
| 9.847e-006 | 5.5  | Spot<br>7  | 1.150e+006                                      | 6.274e+006                                    | 3.862e+006                                    | 4.495e+006                                    |
| 0.125      | 3.0  | Spot<br>8  | 3.429e+006                                      | 2.134e+006                                    | 1.257e+006                                    | 3.787e+006                                    |
| 3.634e-005 | 4.4  | Spot<br>10 | 1.211e+006                                      | 1.944e+006                                    | 8.522e+005                                    | 3.758e+006                                    |
| 1.897e-004 | 3.7  | Spot<br>11 | 7.817e+005                                      | 5.615e+005                                    | 7.522e+005                                    | 2.060e+006                                    |
|            |      |            |                                                 |                                               |                                               |                                               |

|            |     |         |            |            |            |            |
|------------|-----|---------|------------|------------|------------|------------|
| 3.501e-006 | 1.9 | Spot 12 | 2.725e+006 | 3.986e+006 | 2.063e+006 | 3.466e+006 |
| 7.707e-010 | 2.5 | Spot 13 | 5.370e+006 | 8.924e+006 | 3.612e+006 | 4.114e+006 |
| 1.719e-004 | 6.3 | Spot 14 | 3.374e+006 | 7.107e+006 | 6.537e+006 | 2.132e+007 |
| 5.987e-005 | 2.5 | Spot 15 | 2.216e+006 | 1.805e+006 | 2.205e+006 | 4.551e+006 |
| 1.687e-006 | 3.4 | Spot 16 | 1.657e+006 | 2.893e+006 | 3.772e+006 | 5.654e+006 |
| 2.662e-007 | 6.0 | Spot 22 | 4.617e+005 | 2.775e+006 | 9.992e+005 | 2.550e+006 |
| 0.002      | 2.1 | Spot 24 | 7.639e+005 | 1.174e+006 | 5.675e+005 | 9.933e+005 |

**Identifier 339**

**Position** (1198, 229)

**Notes** Spot 17

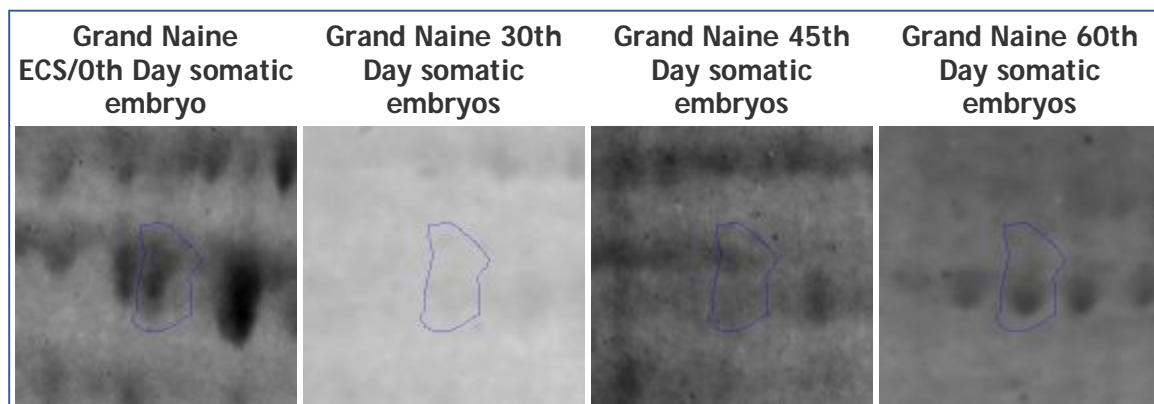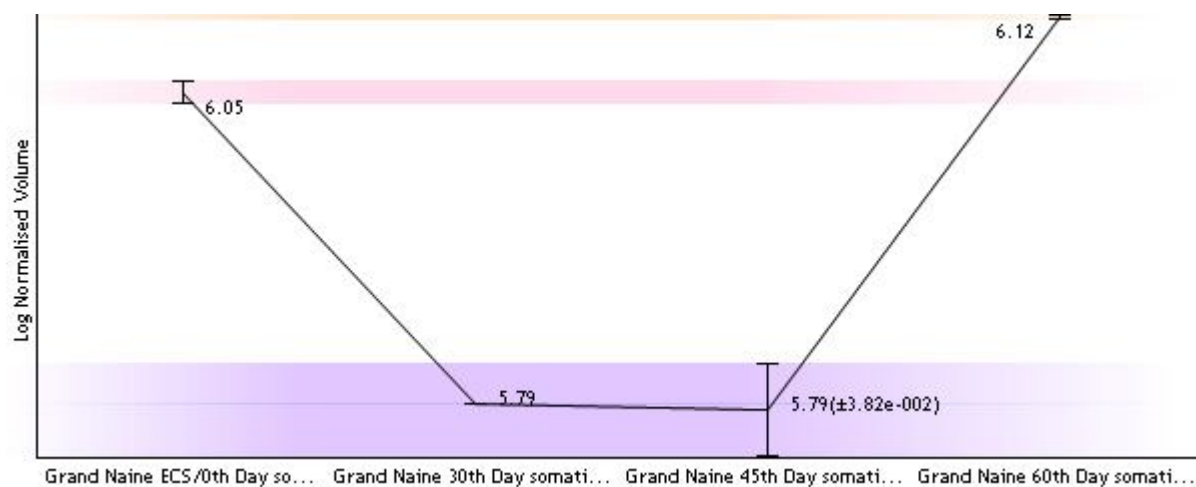

**Identifier 394**

**Position** (1086, 254)

**Notes** Spot 21

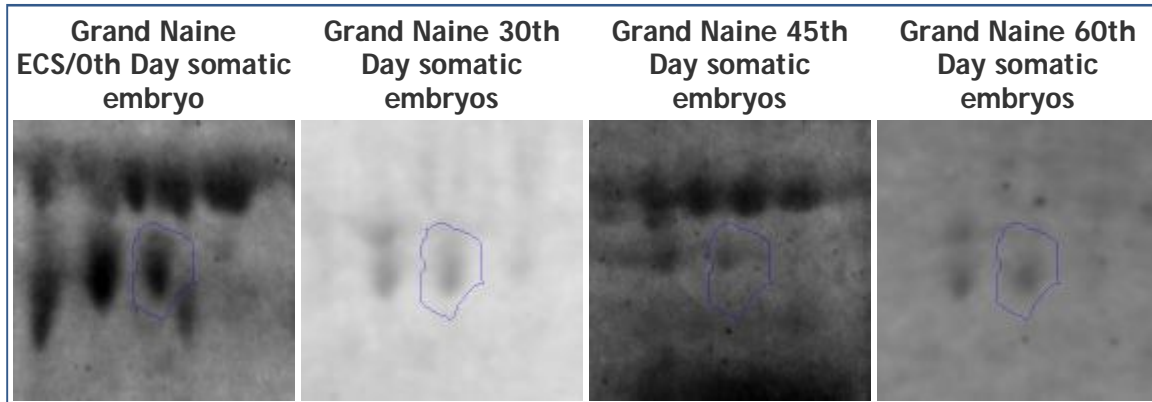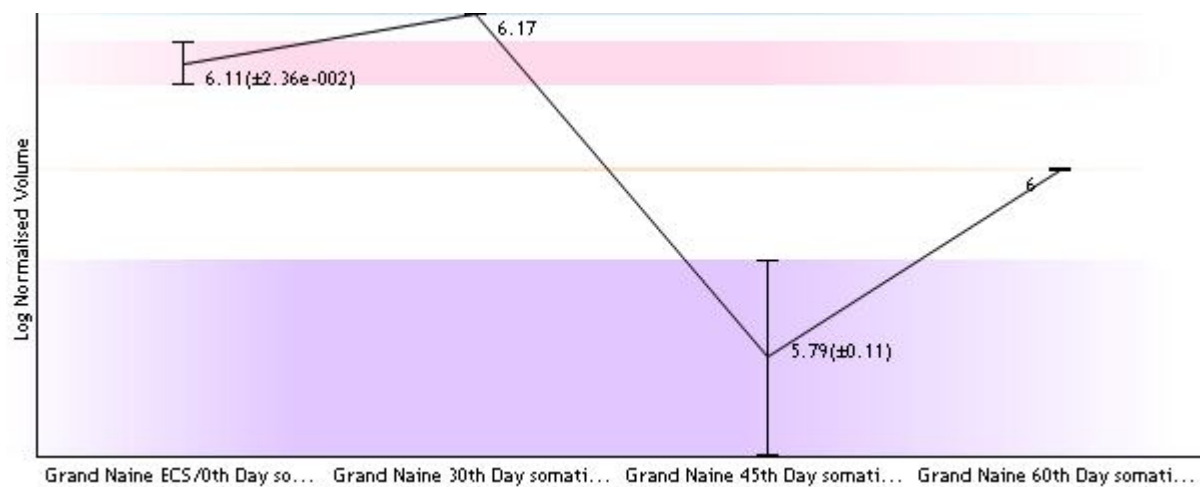

**Identifier 1432**

**Position** (1387, 860)

**Notes** Spot 20

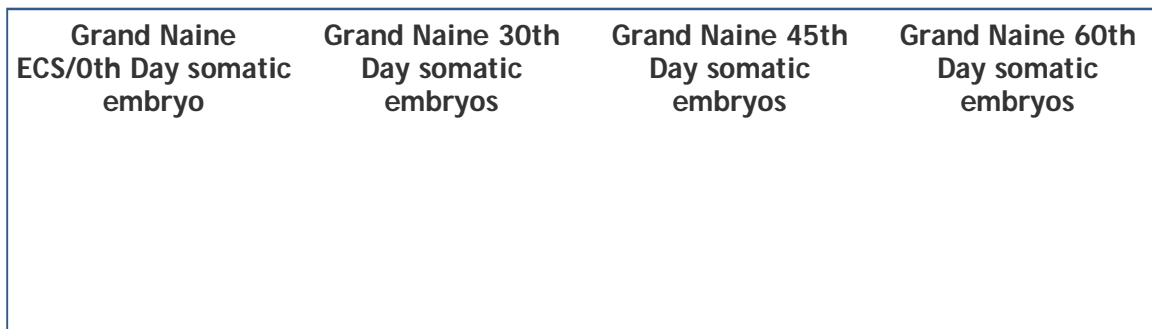

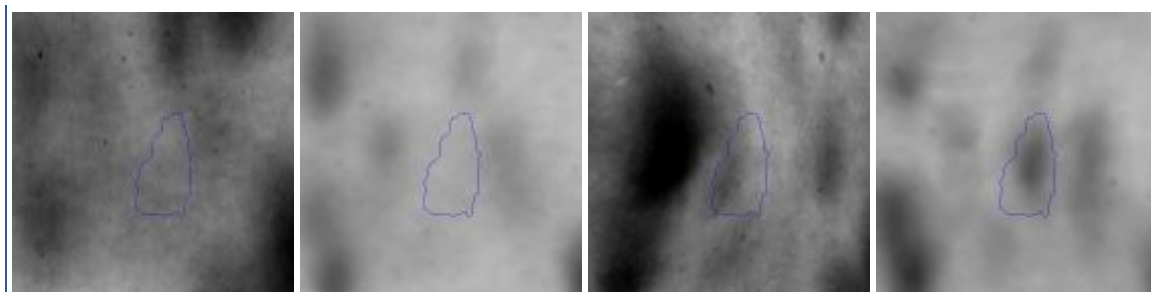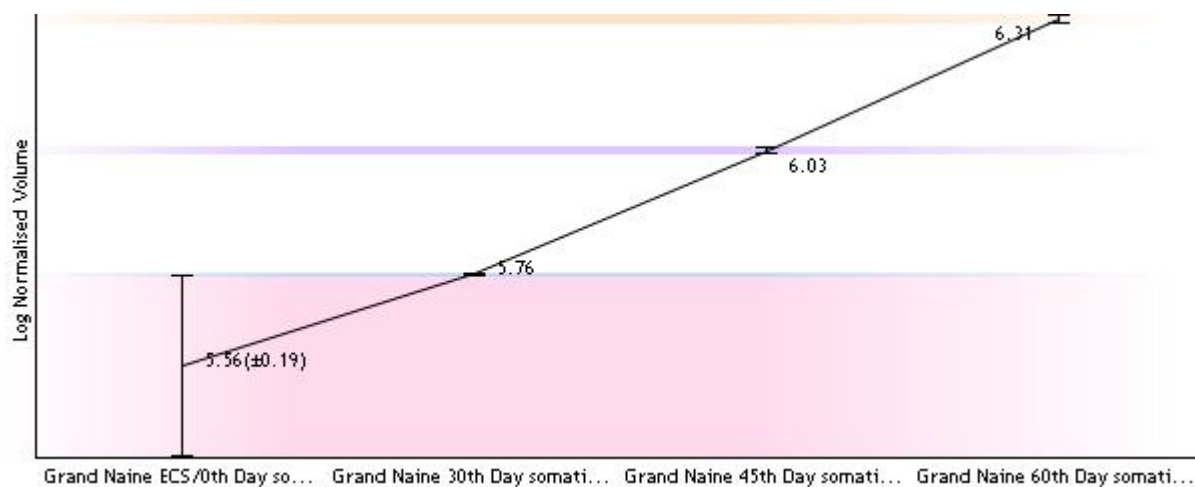

Identifier 1876

Position (560, 1153)

Notes Spot 23

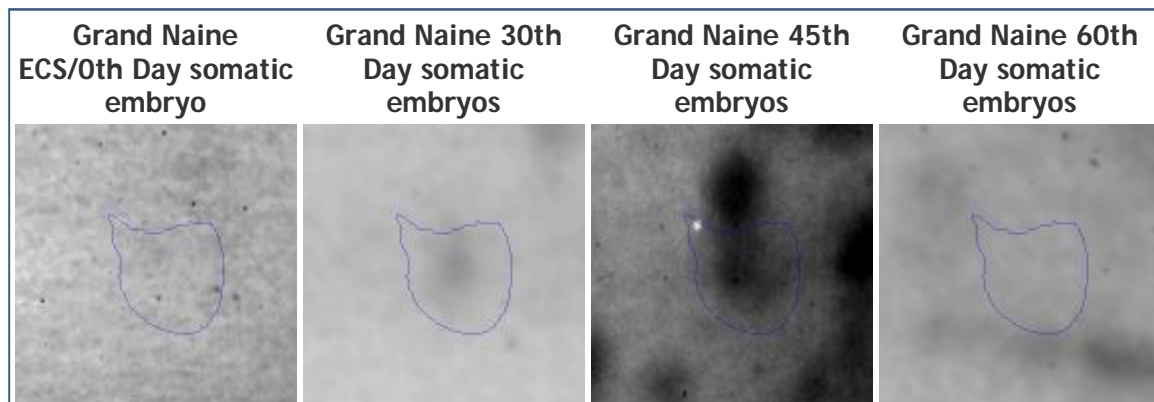

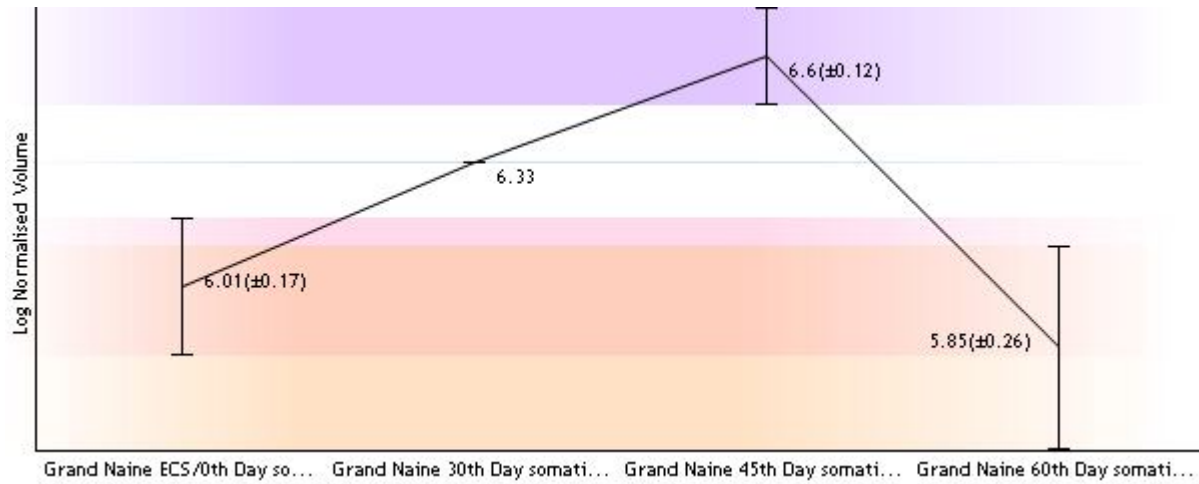

Identifier 2015

Position (1792, 1245)

Notes Spot 4

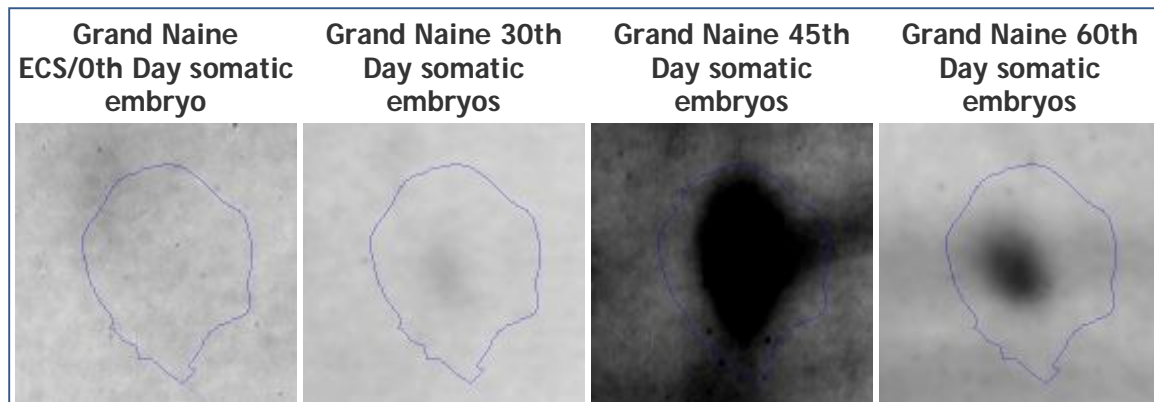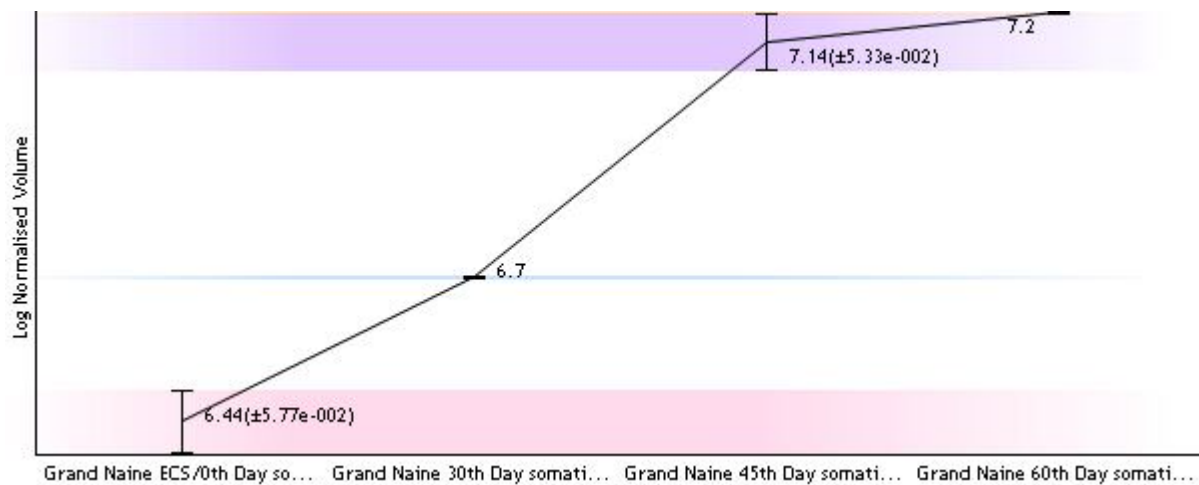

Identifier 2056



Position (1391, 1266)

Notes Spot 18

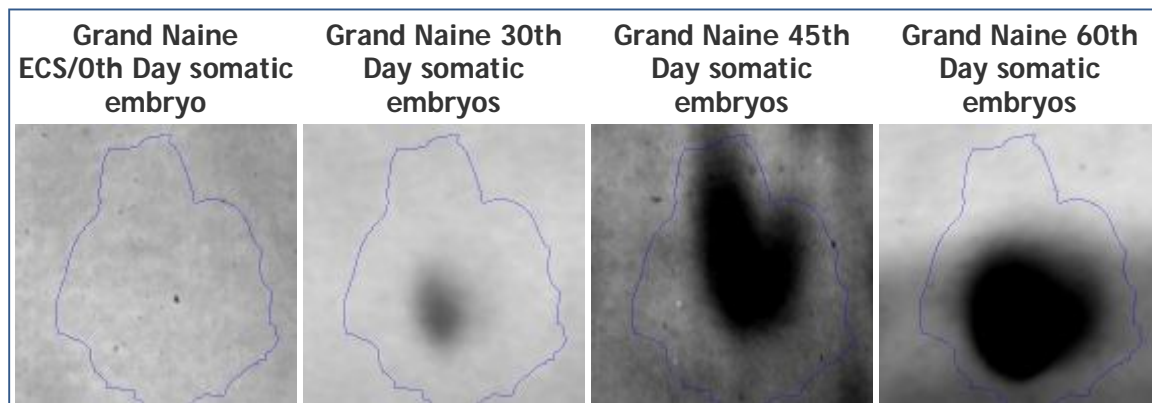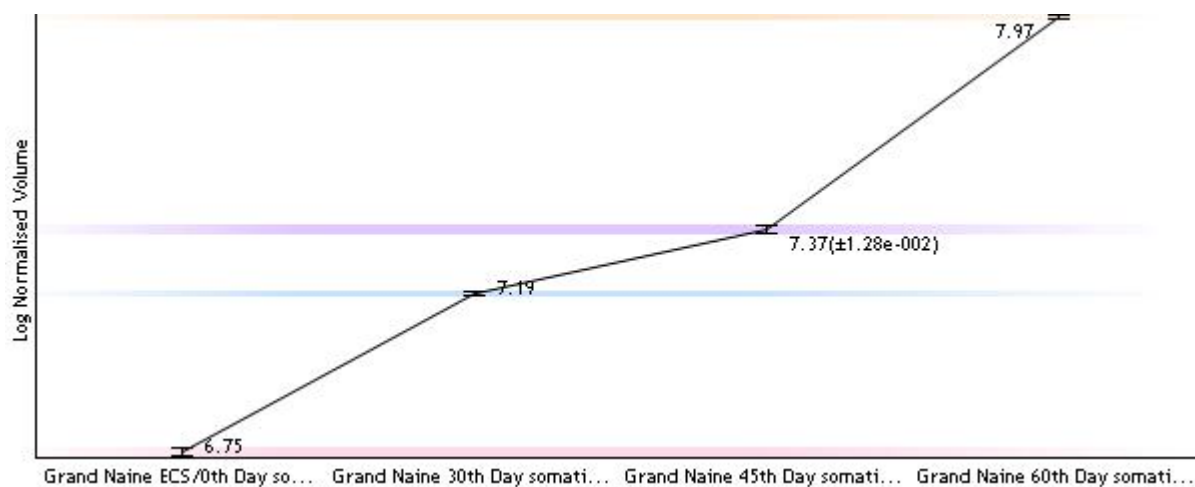

Identifier 2060

Position (1294, 1269)

Notes Spot 19

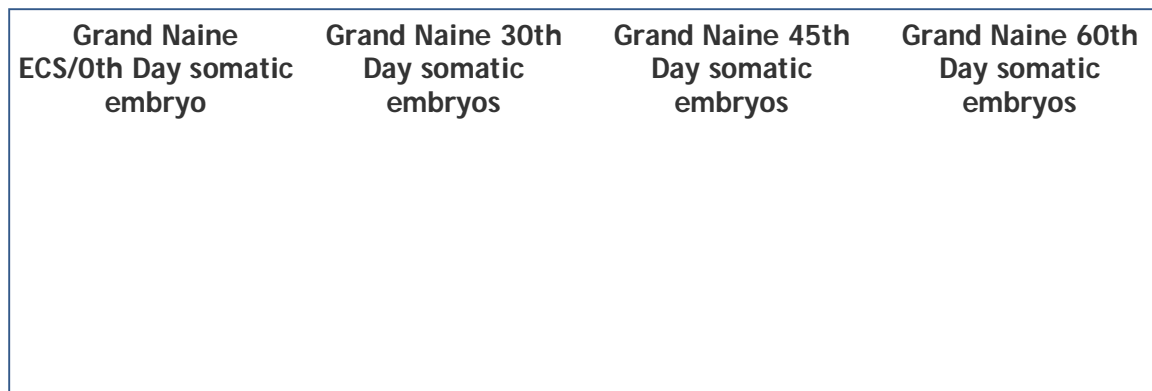

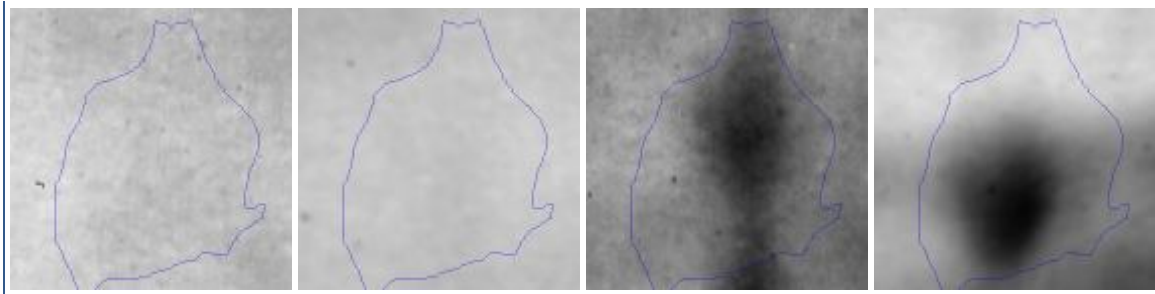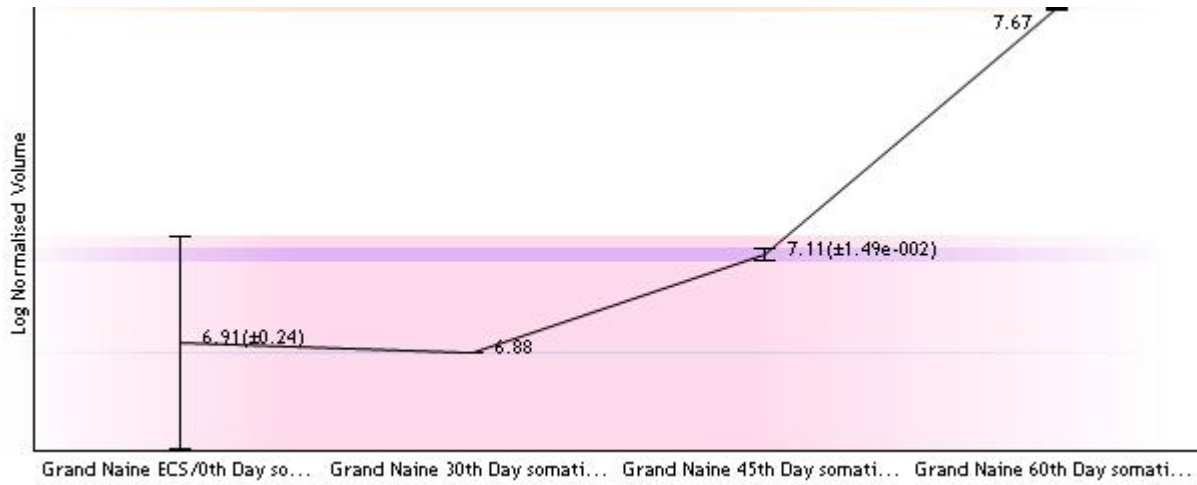

Identifier 2095

Position (665, 1296)

Notes Spot 9

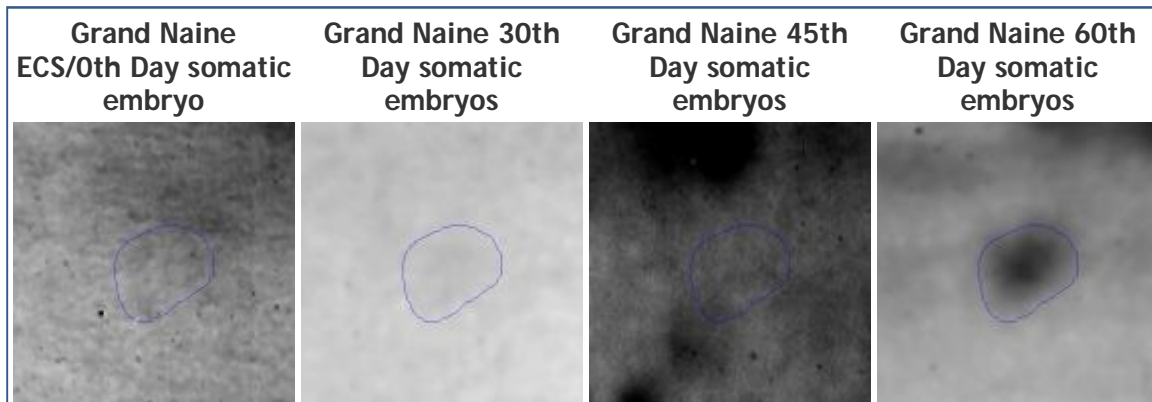

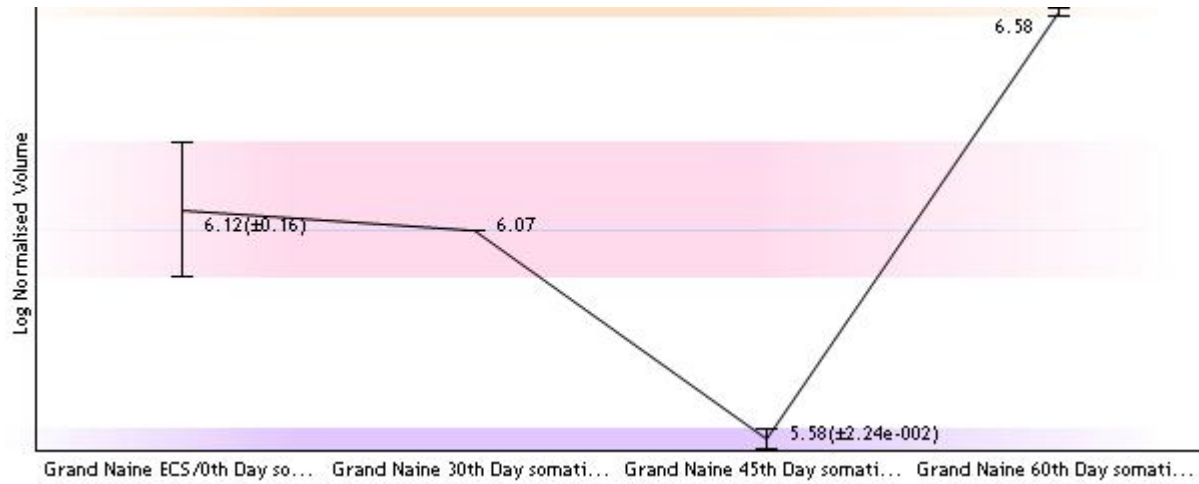

Identifier 2282

Position (1374, 1428)

Notes Spot 25

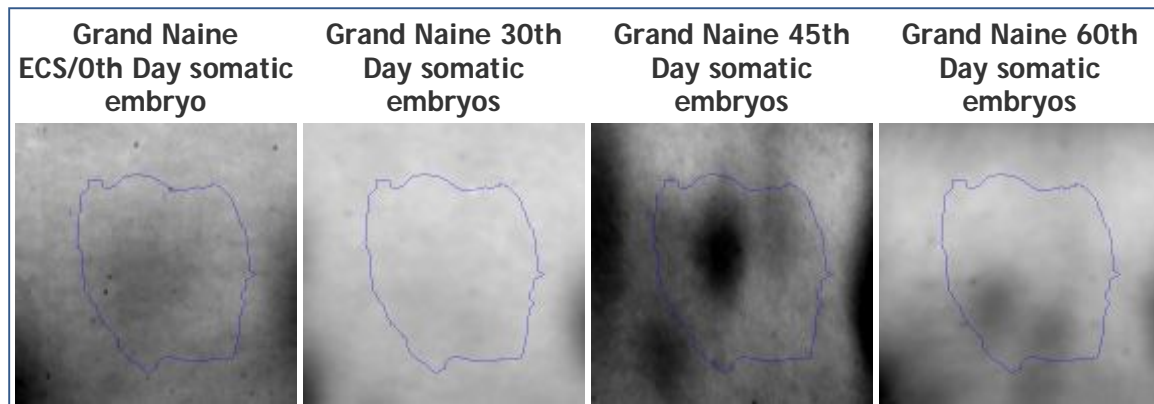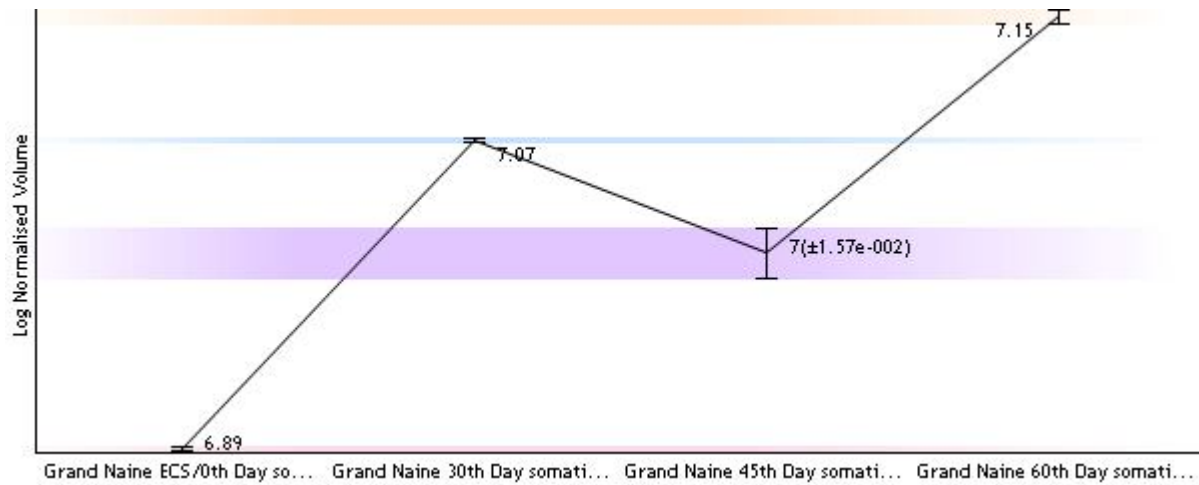

Identifier 3158

**Position** (2031, 1874)

**Notes** Spot 6

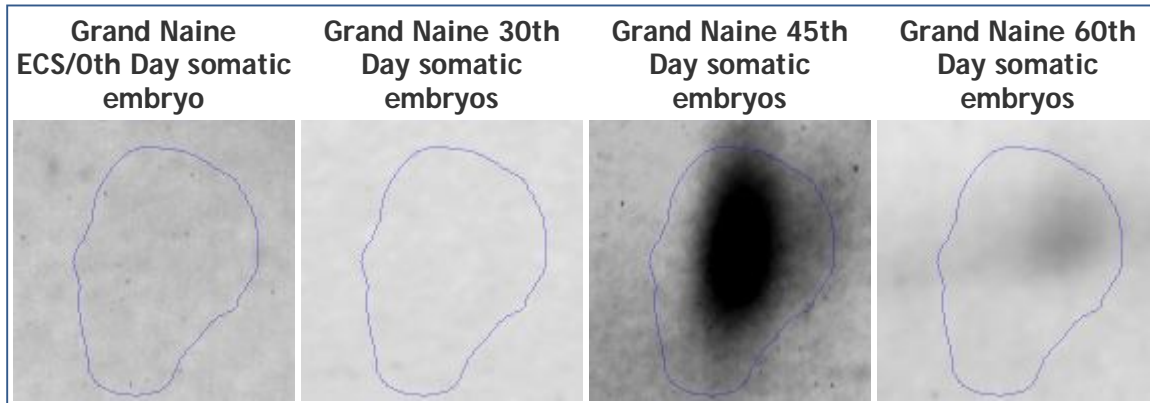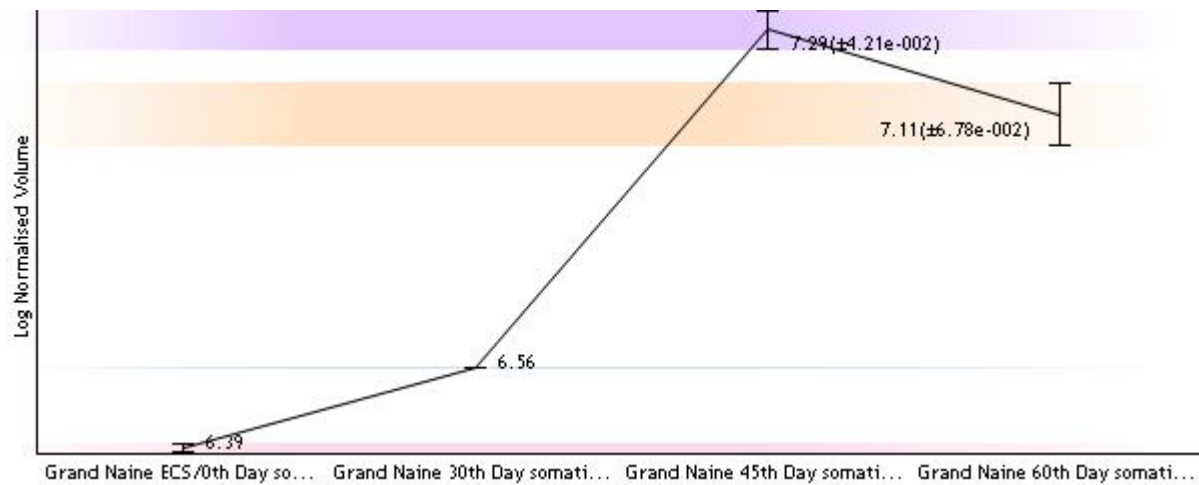

**Identifier** 3248

**Position** (1340, 1922)

**Notes** Spot 3

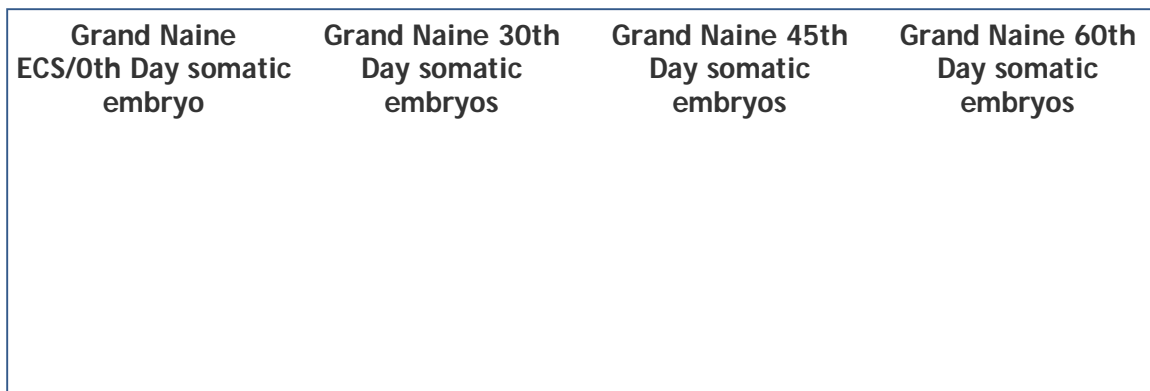

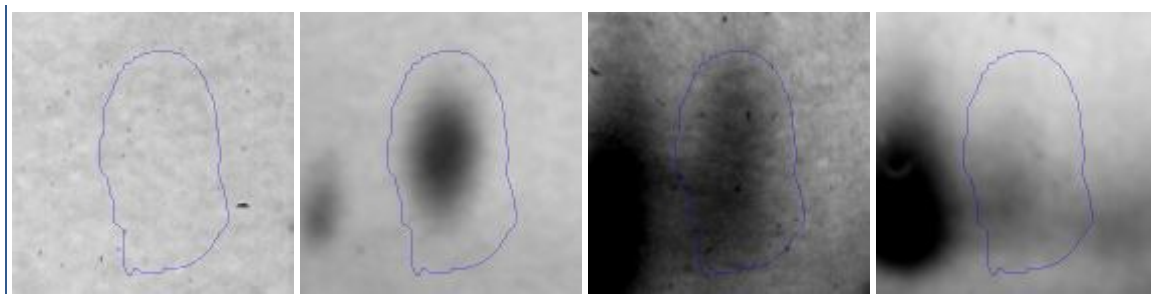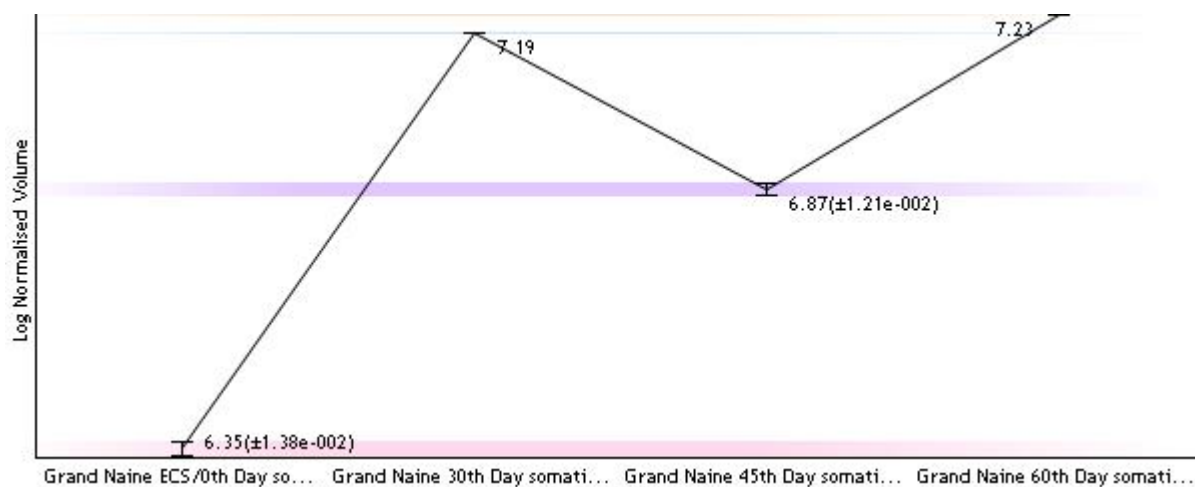

**Identifier 3327**

**Position** (1675, 1972)

**Notes** Spot 1

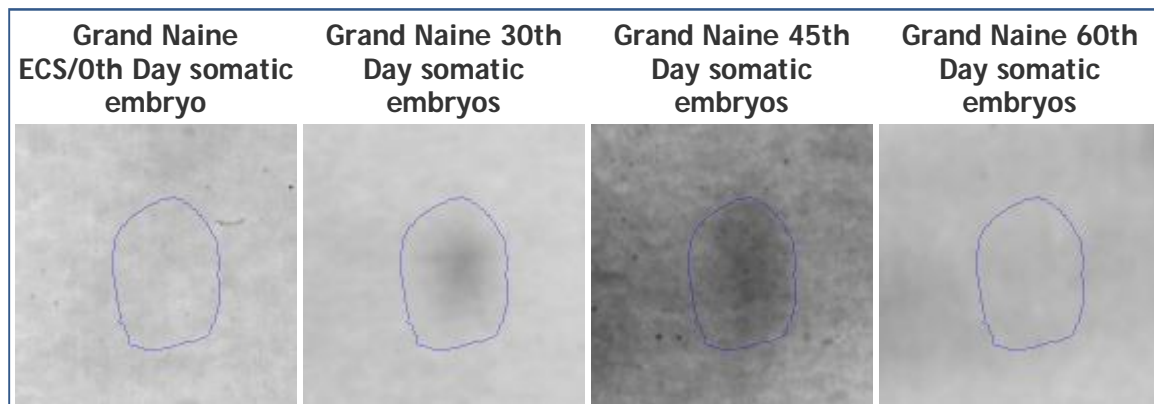

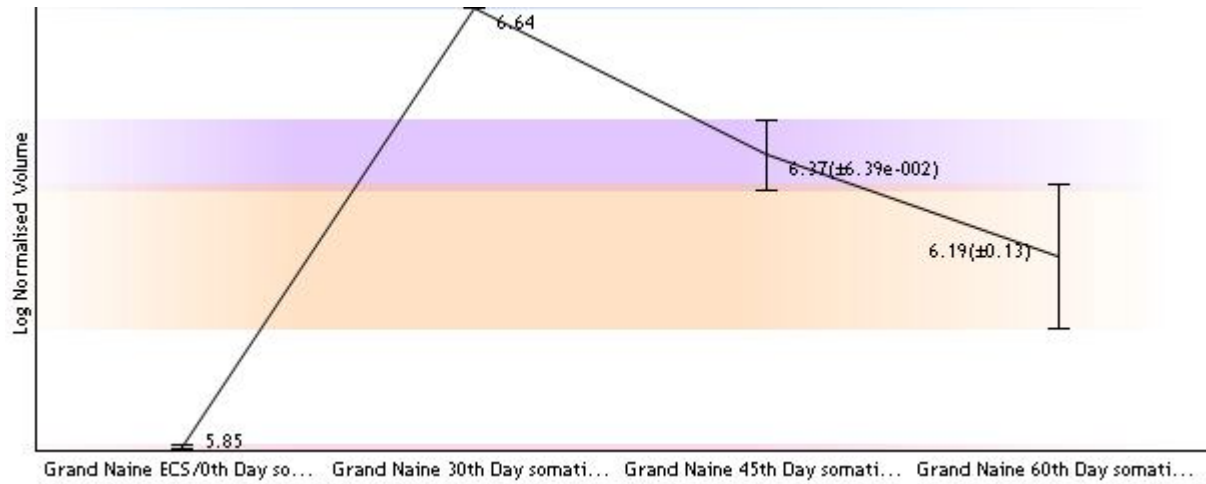

Identifier 3865

Position (1455, 1952)

Notes Spot 2

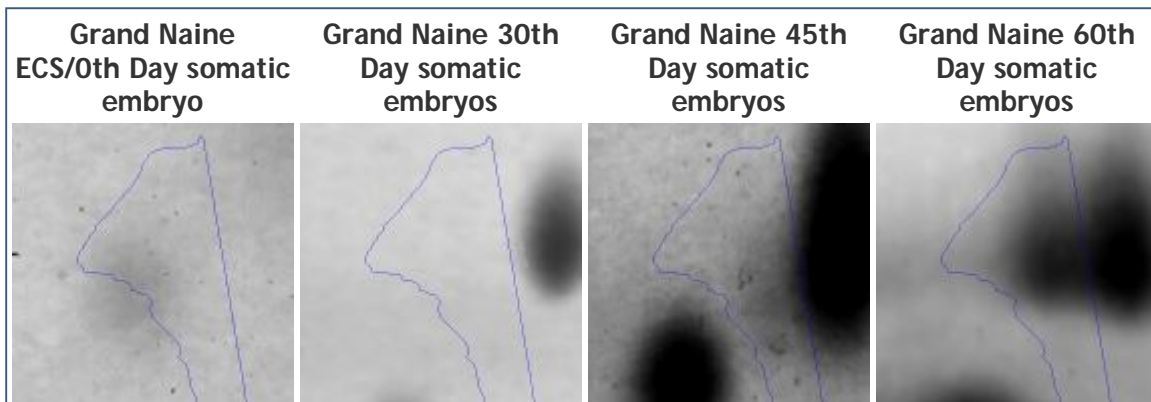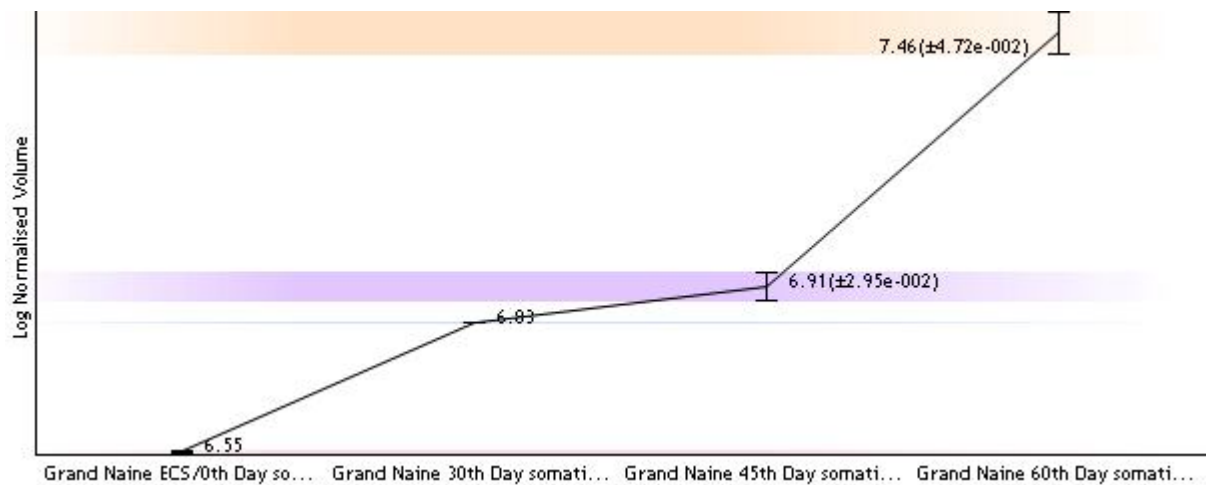

Identifier 3874

Position (650, 1191)

Notes Spot 5

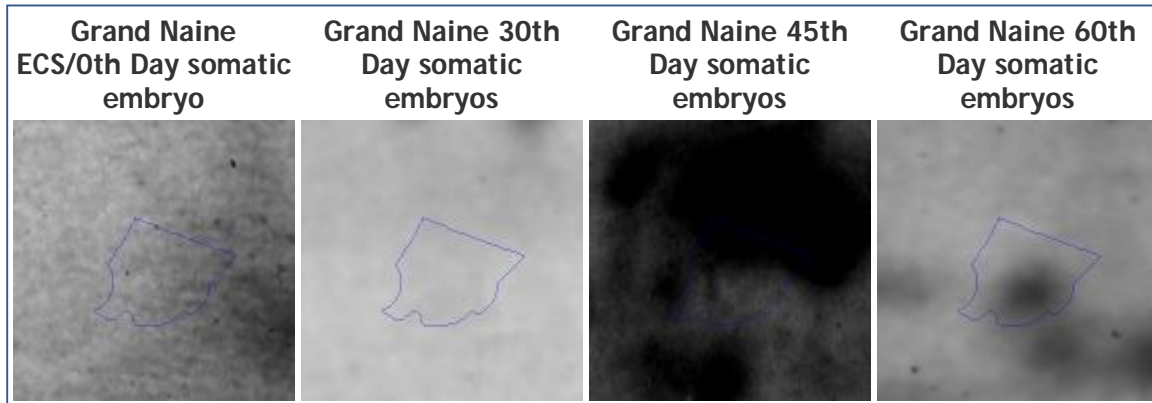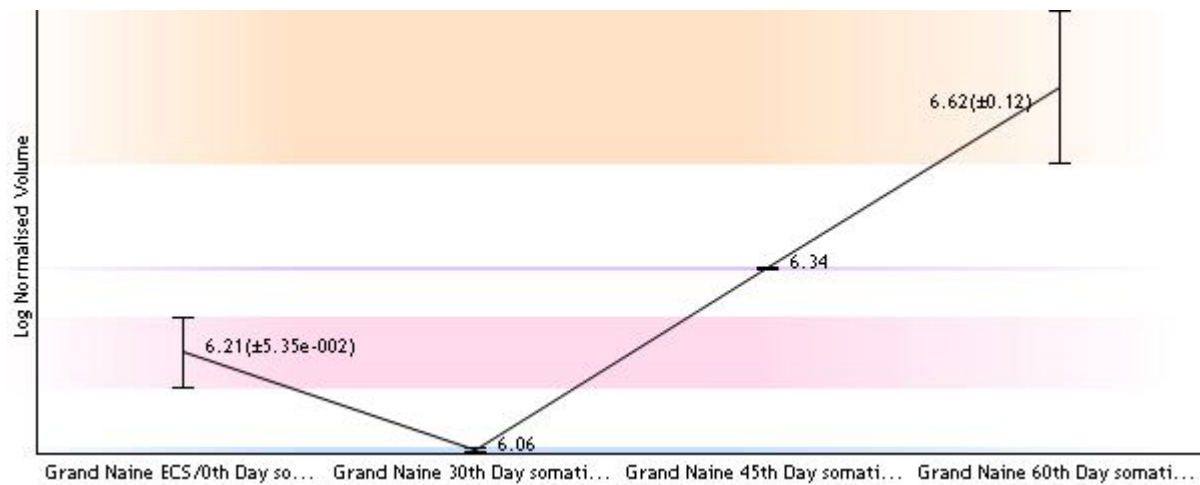

Identifier 3879

Position (1719, 963)

Notes Spot 7

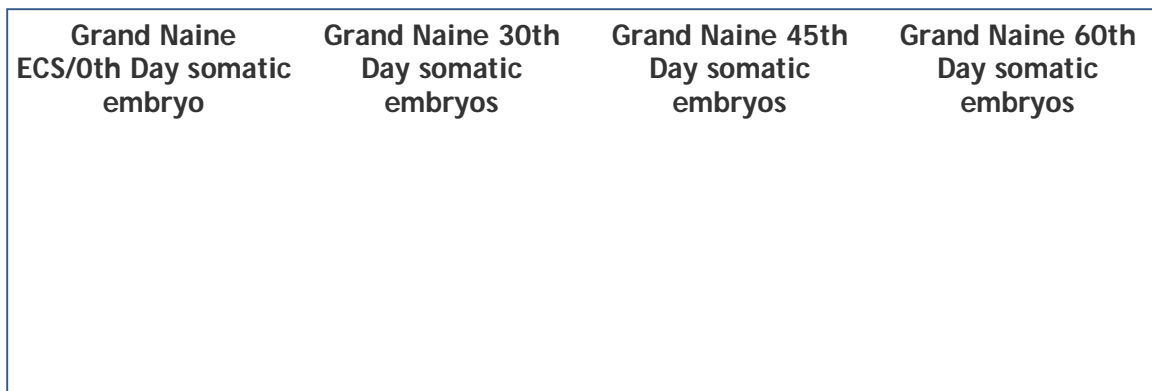

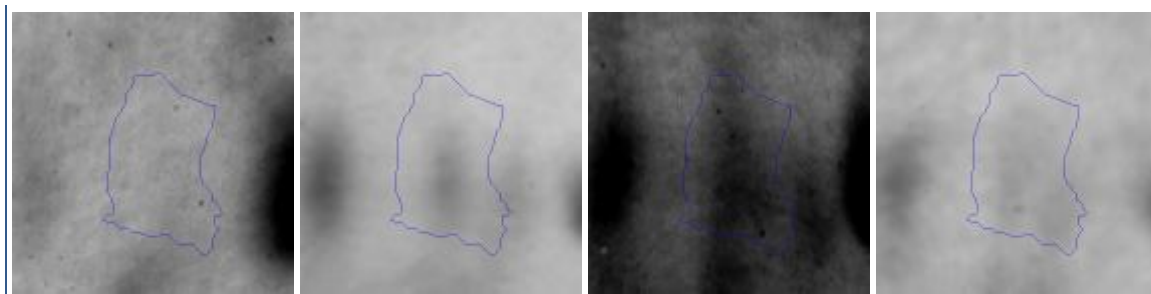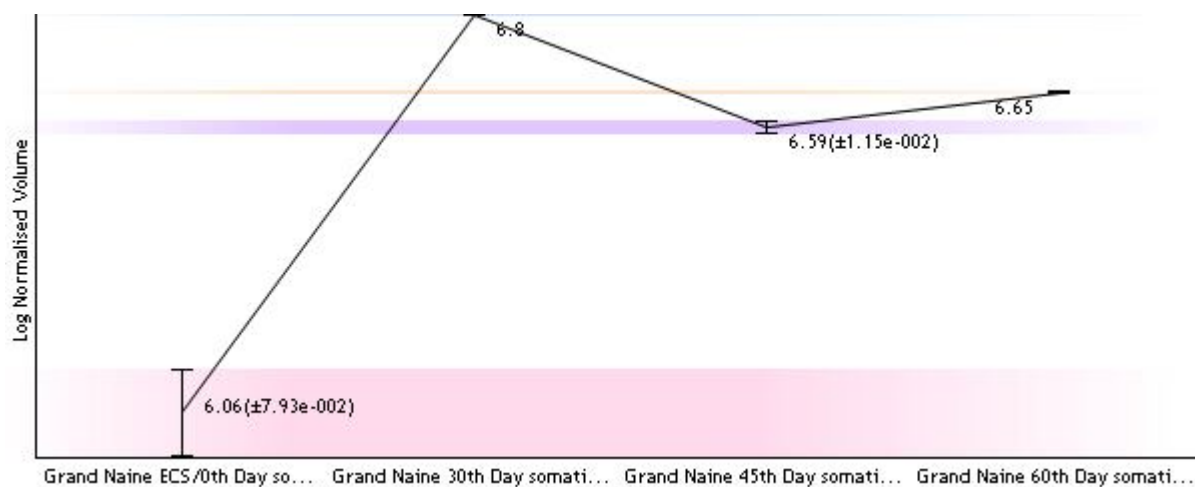

**Identifier 3881**

**Position** (1503, 897)

**Notes** Spot 8

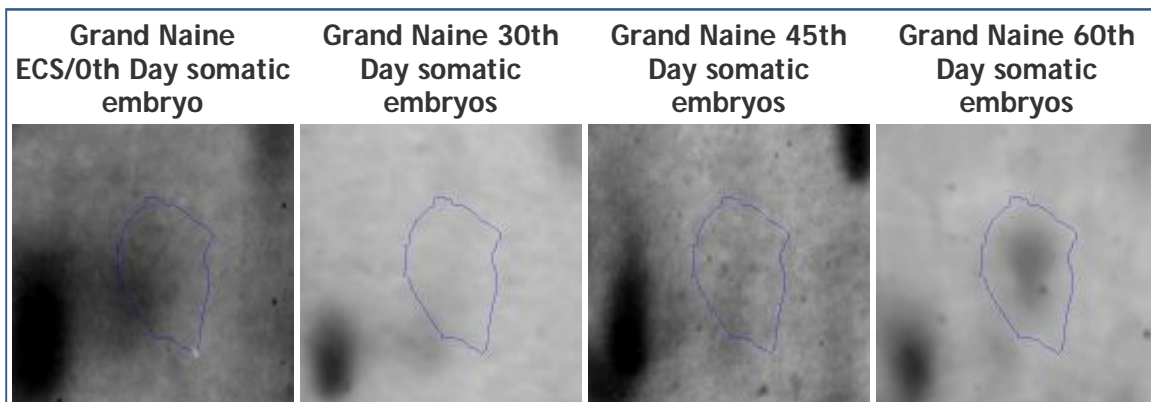



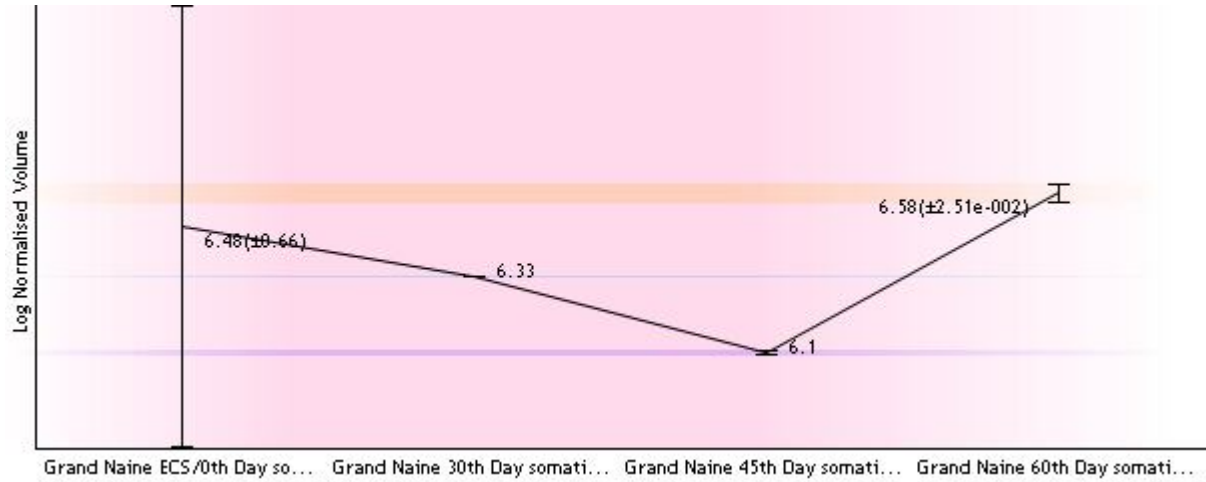

Identifier 3888

Position (717, 1218)

Notes Spot 10

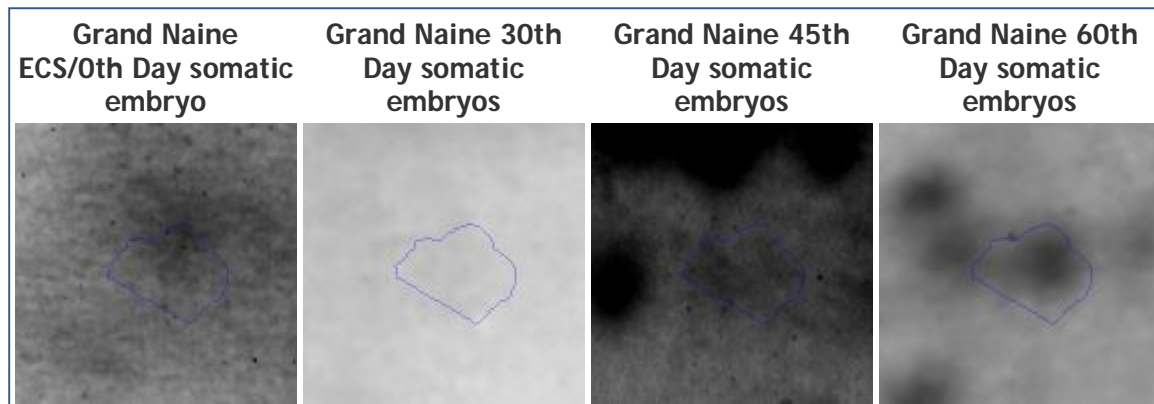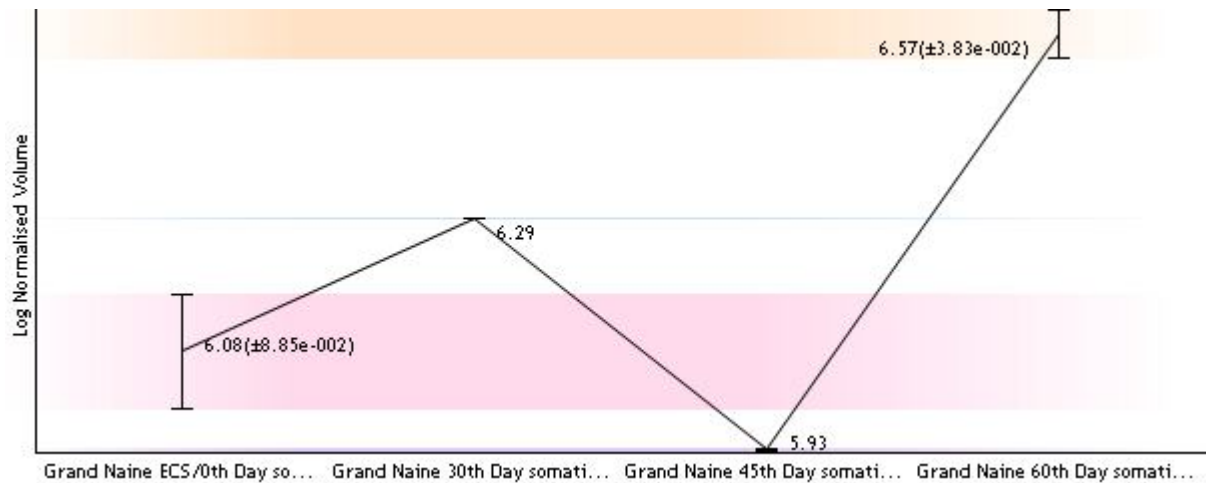

Identifier 3896

Position (685, 1223)

Notes Spot 11

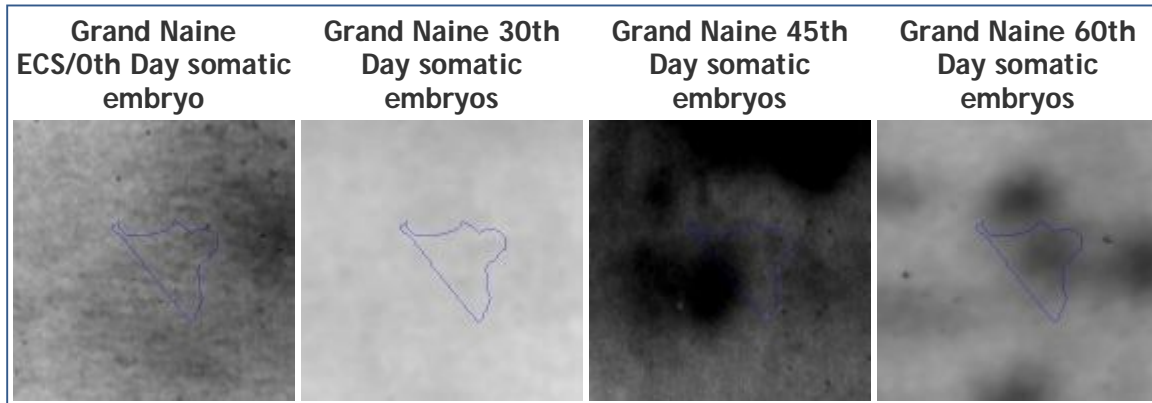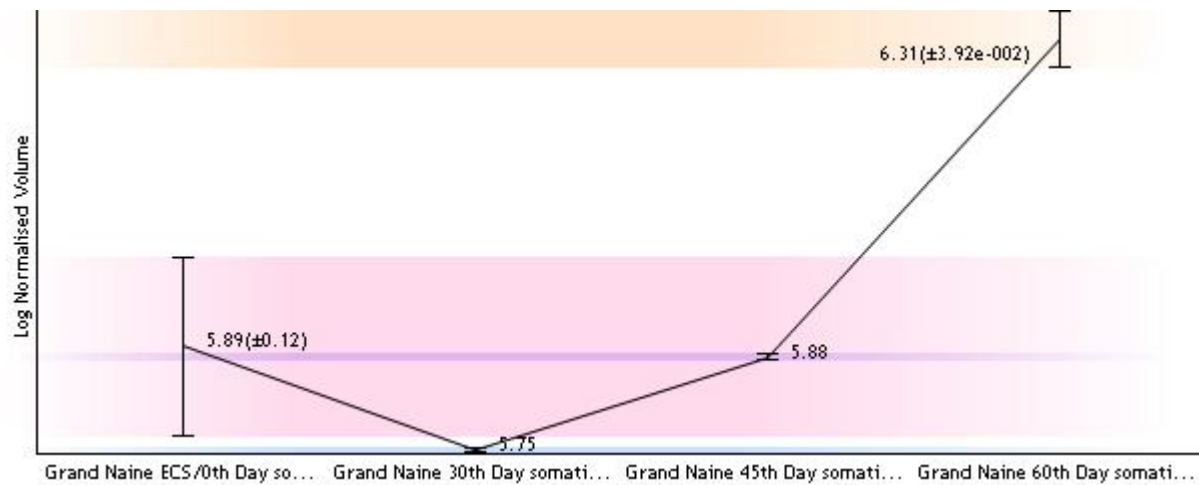

Identifier 3899

Position (846, 625)

Notes Spot 12

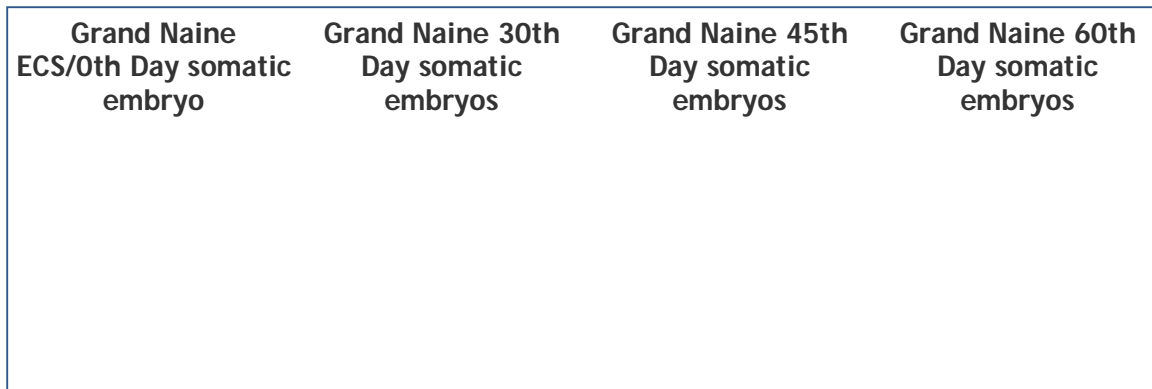

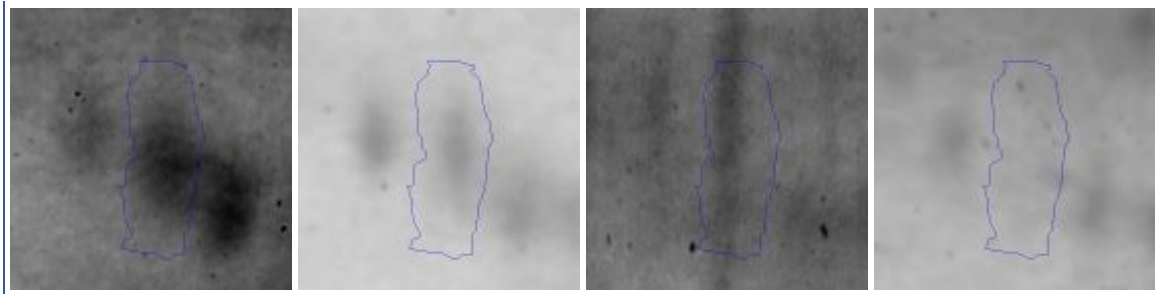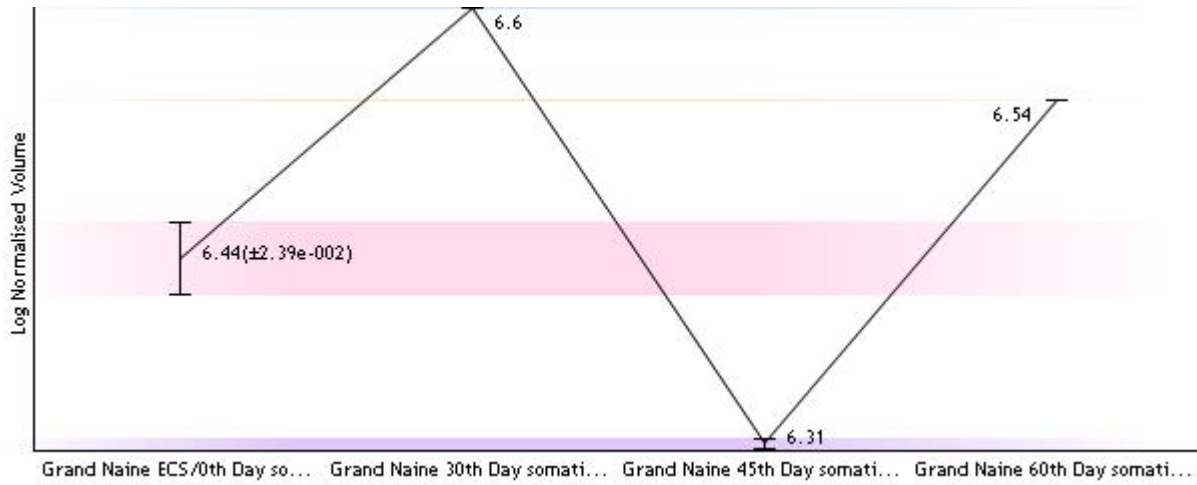

Identifier 3902

Position (981, 667)

Notes Spot 13

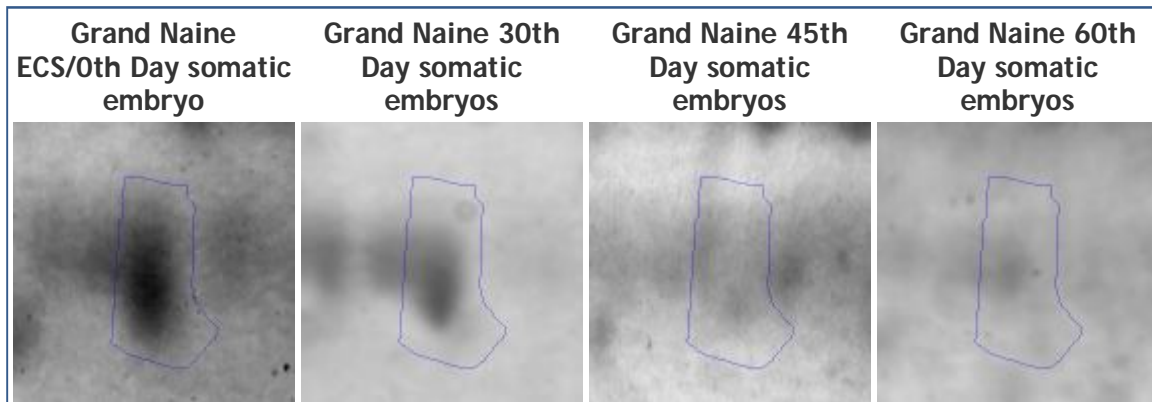

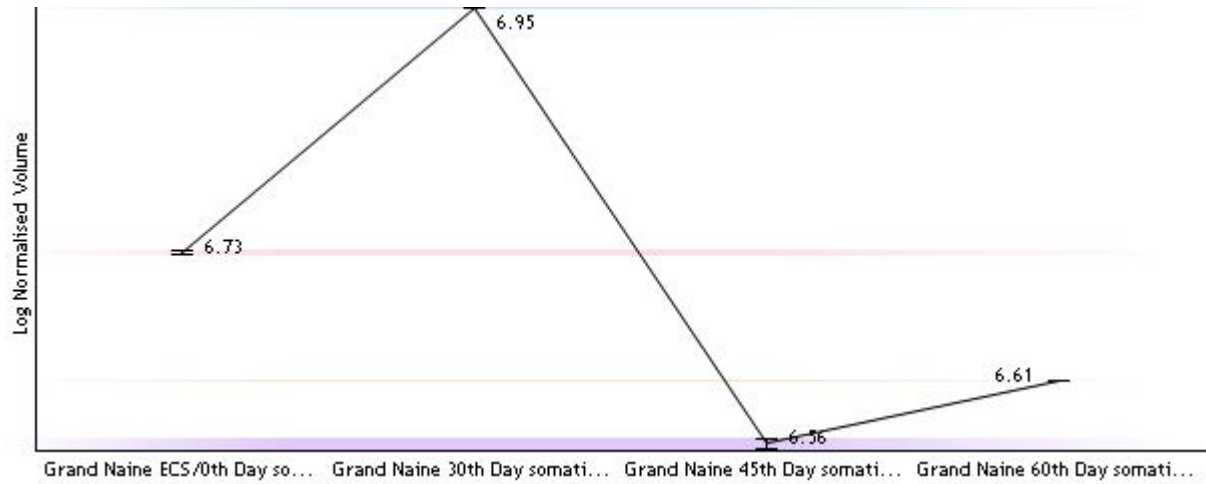

**Identifier 3903**

**Position** (1176, 1255)

**Notes** Spot 14

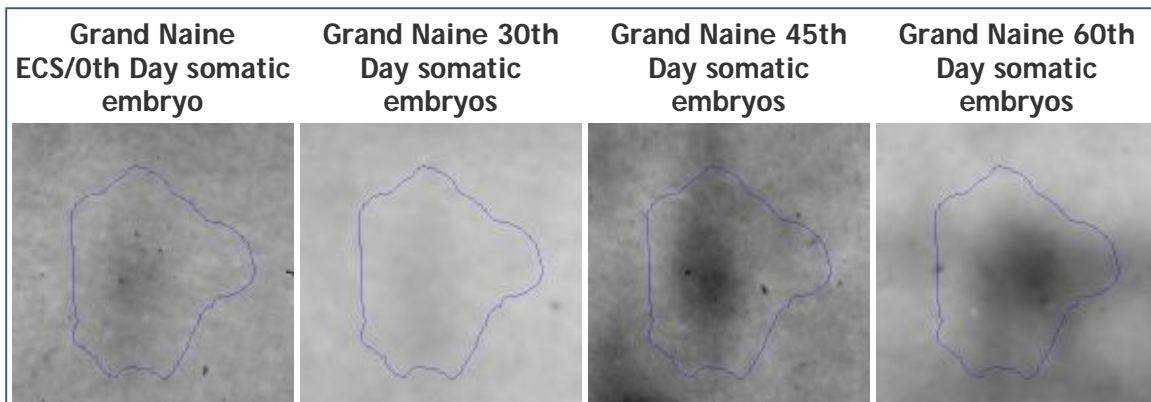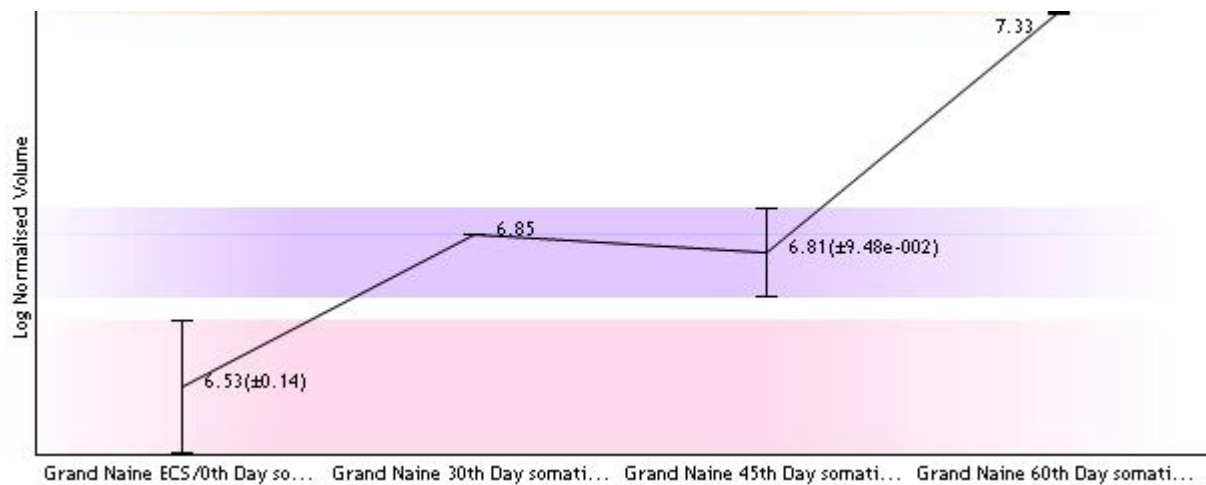

**Identifier 3904**

**Position** (1056, 1276)

**Notes** Spot 15

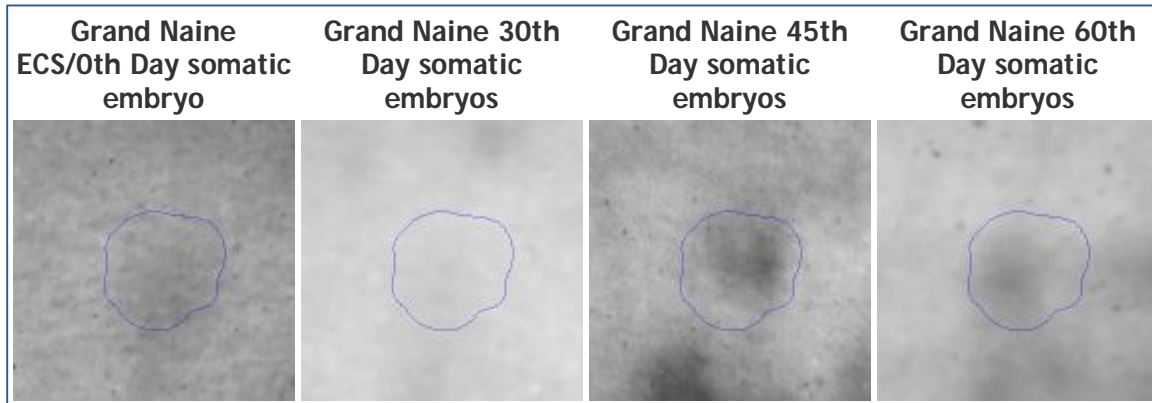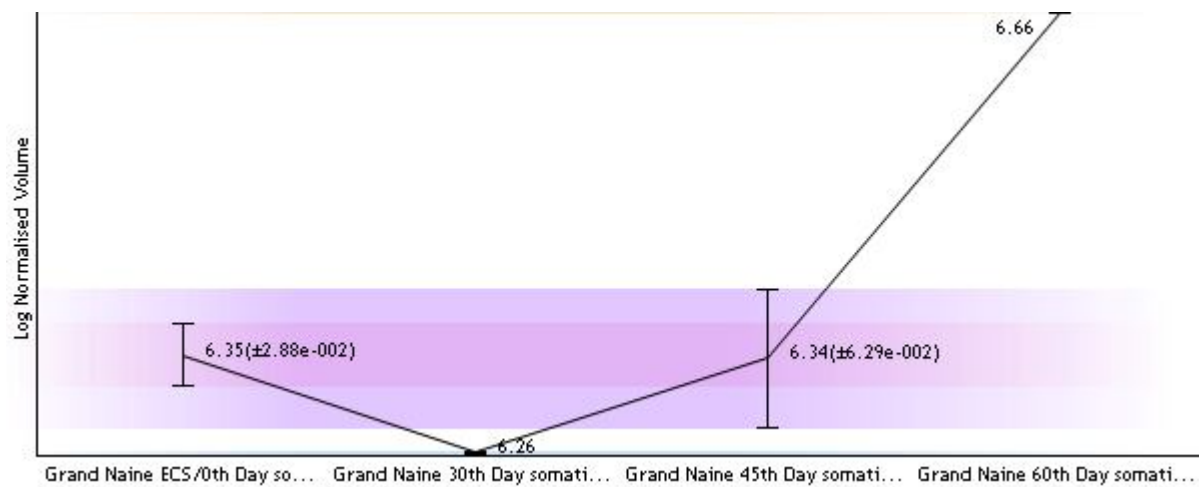

**Identifier** 3905

**Position** (1150, 1050)

**Notes** Spot 16



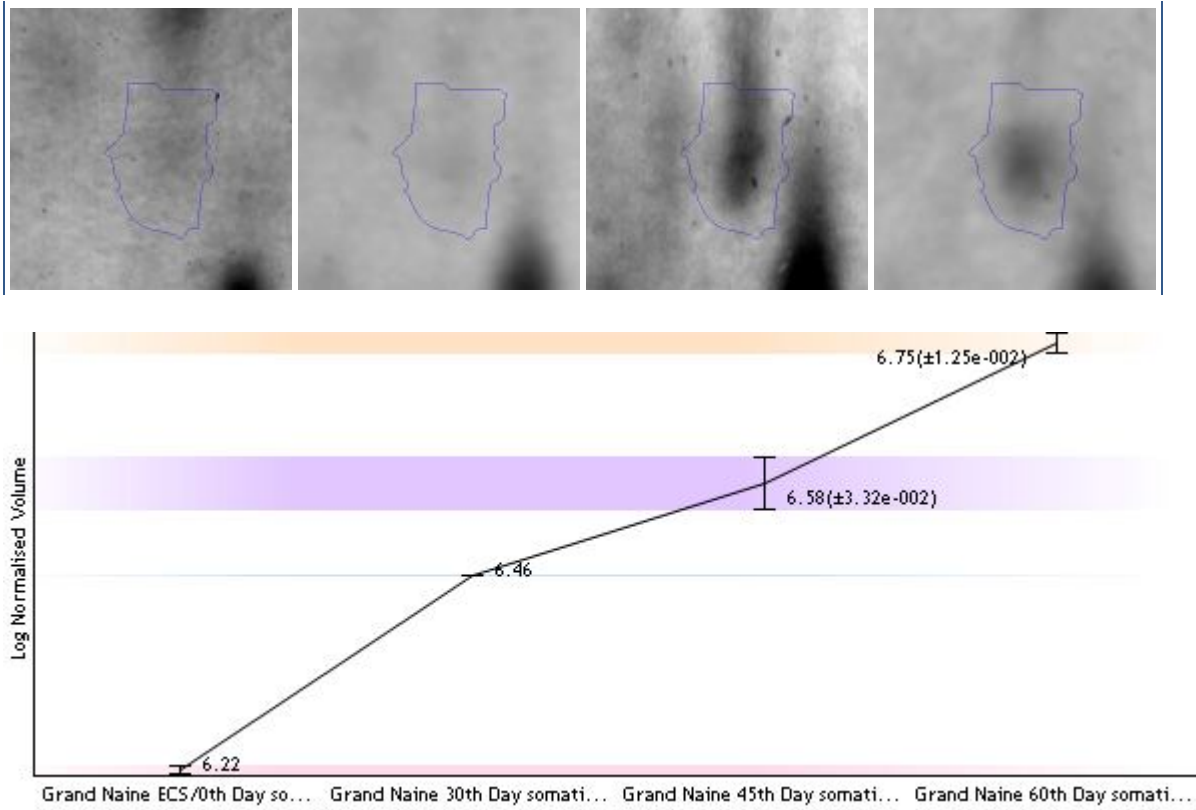

Identifier 3969

Position (1192, 1886)

Notes Spot 22

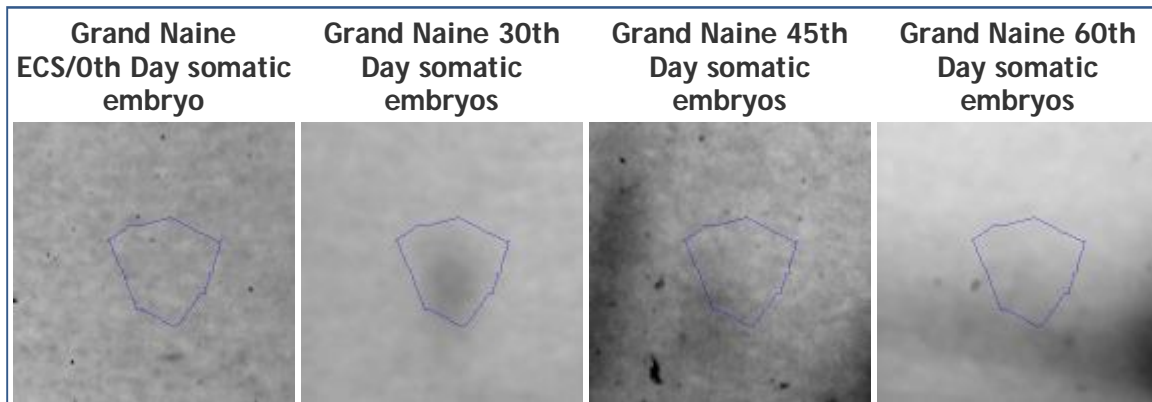

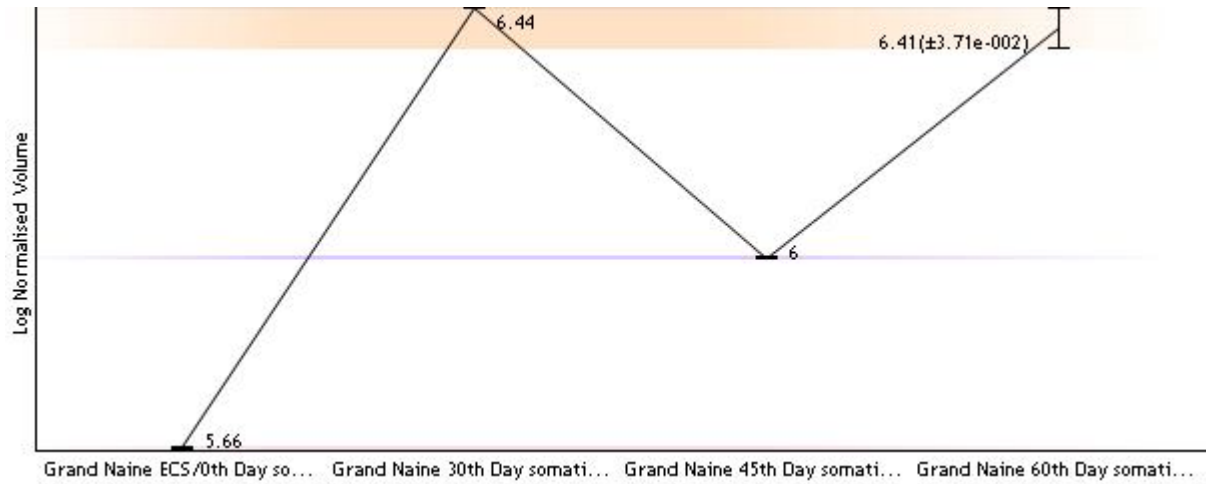

Identifier 3970

Position (1080, 1162)

Notes Spot 24

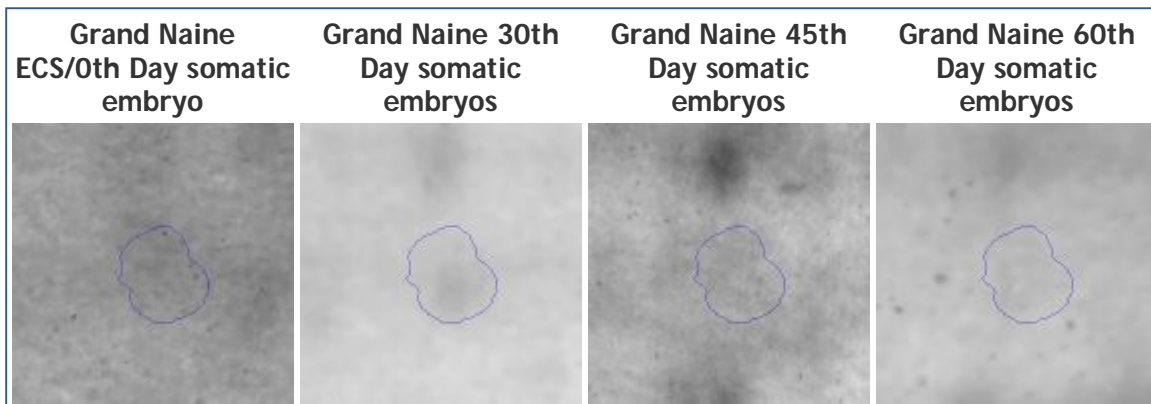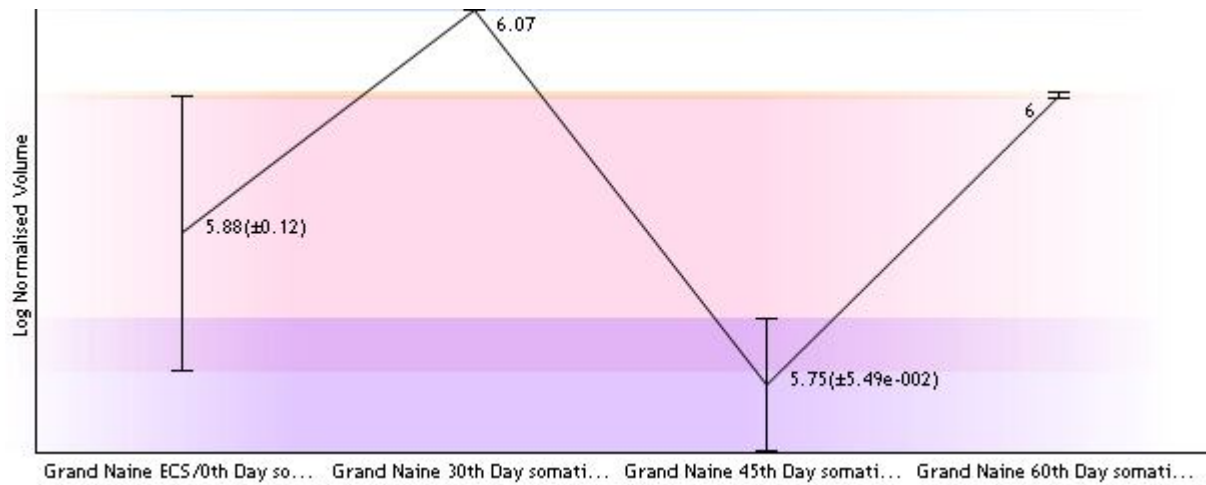

Supplement: 41598_2020_61005_MOESM2_ESM.pdf [file 41598_2020_61005_MOESM2_ESM.pdf]
